# Supplementary material for: Laser directed writing of flat lenses on buckypaper
Source: Royal Society of Chemistry journal article supplement (doi:10.1039/c5nr02481a), 2015-01-01
Supplement: c5nr02481a1.pdf [file c5nr02481a1.pdf]

## Supplementary

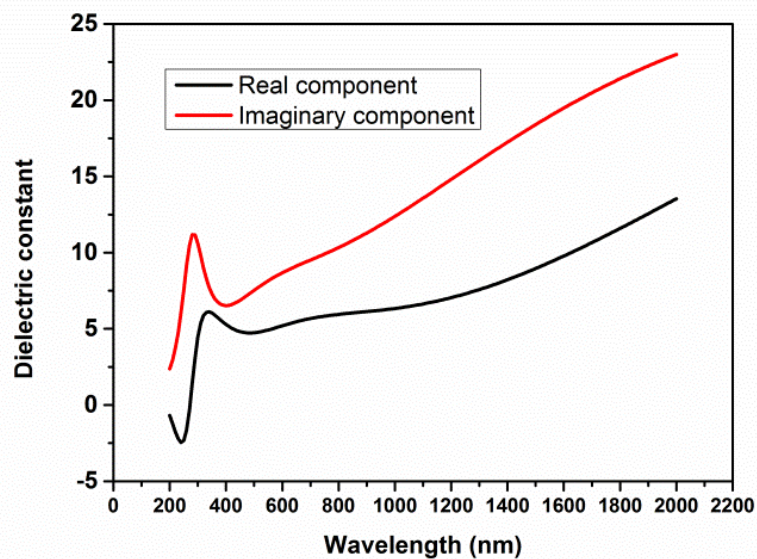

S1. Dielectric constant obtained from equation (1) in visible-near infrared regime

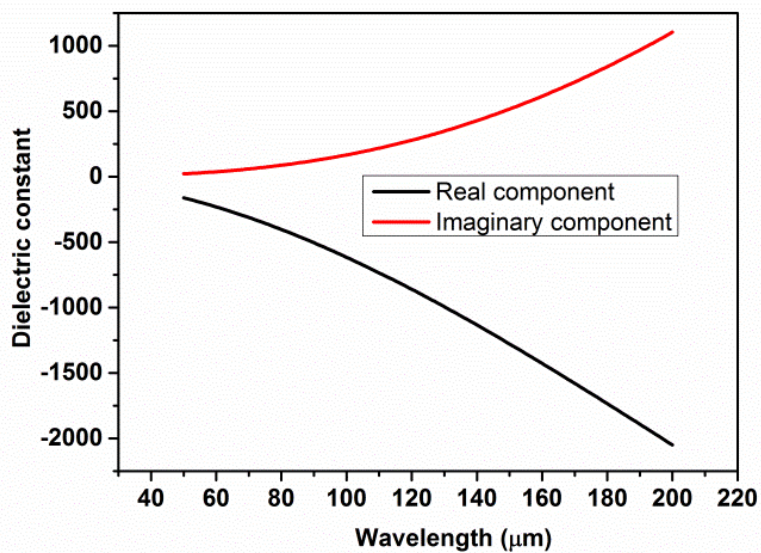

S2. Dielectric constant obtained from equation (2) in ThZ regime

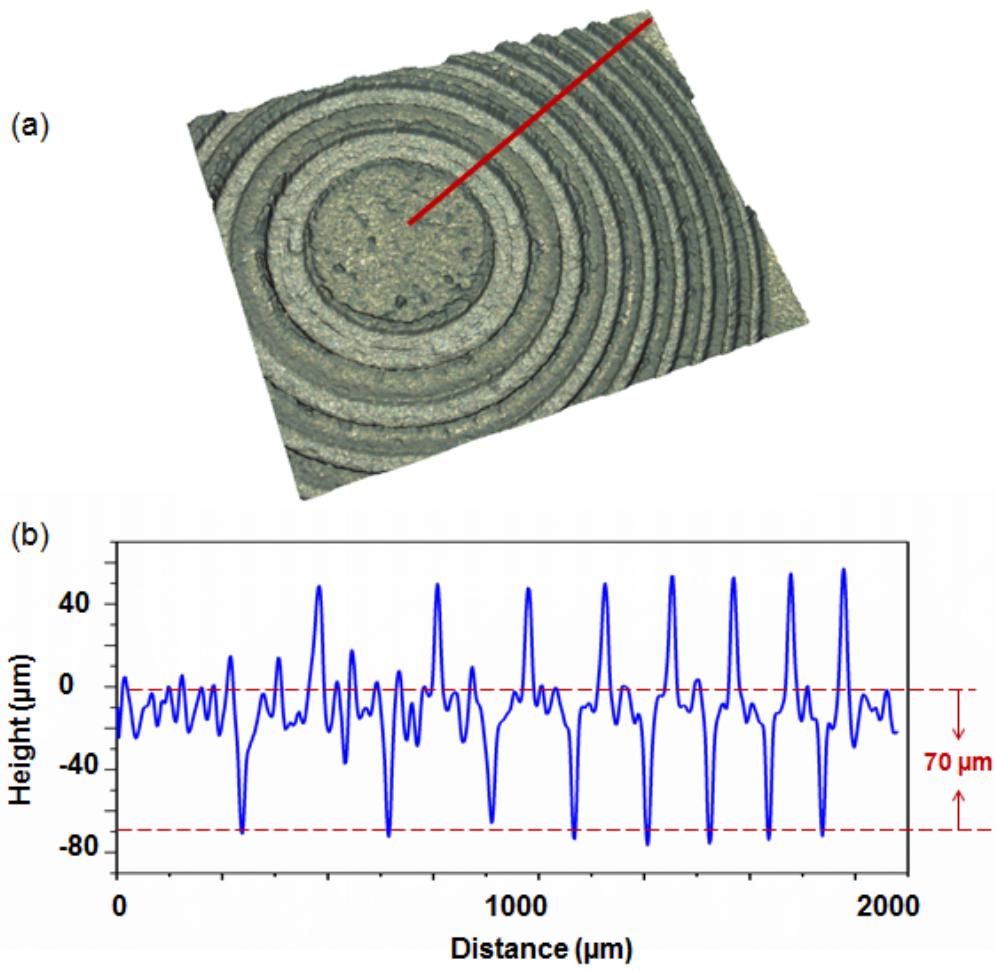

S3. (a) 3D image of buckypaper FZP lens, which is taken by Alicona microscope, (b) Roughness along the red line in (a). The depth of the lens is near 70  $\mu\text{m}$ .

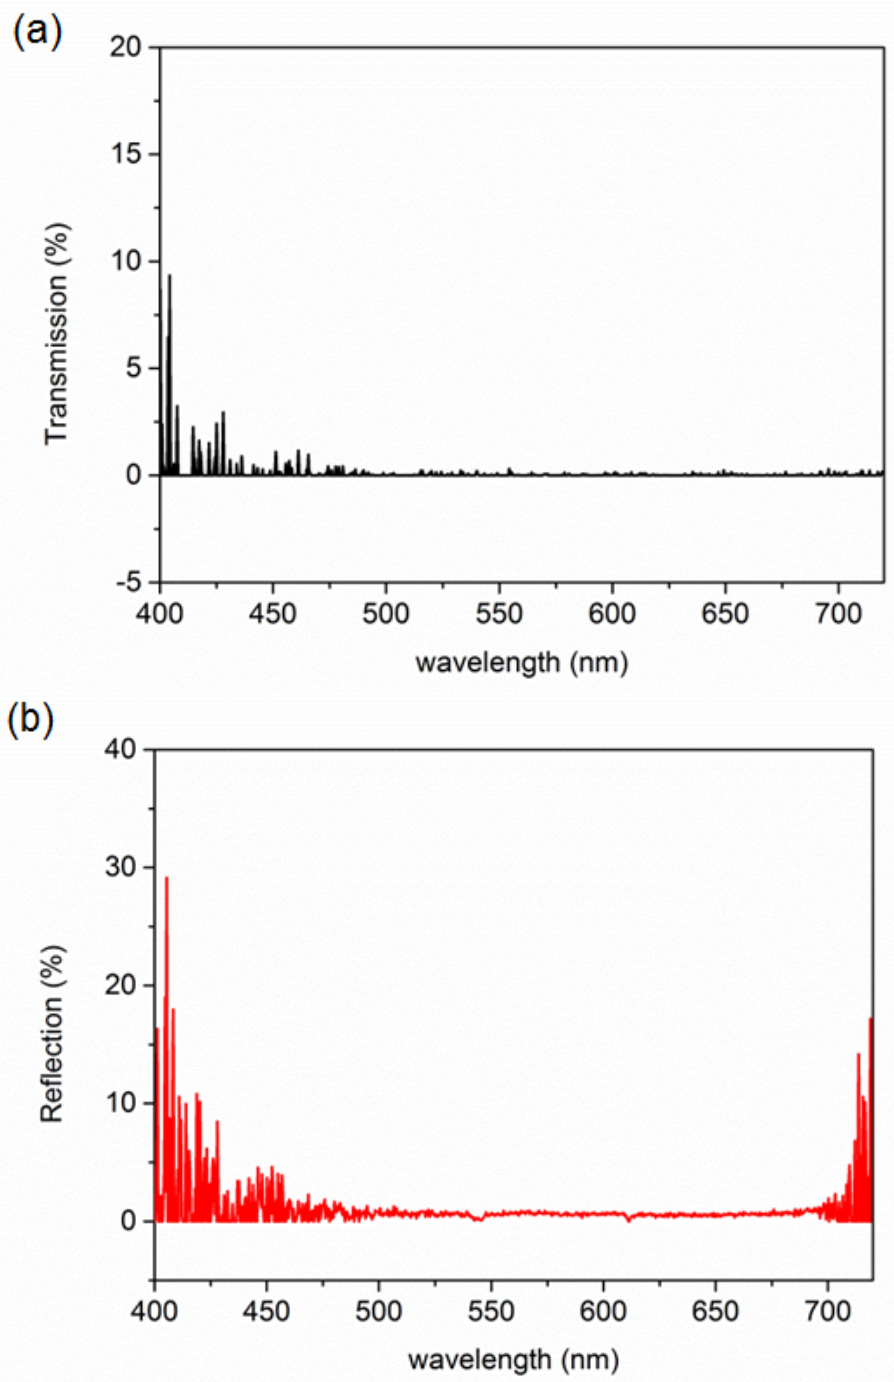

S4. (a) and (b) are the transmittance and reflection of the buckypaper respectively .
